# Supplementary material
Source: Frontiers journal article supplement (https://www.frontiersin.org/articles/499152)
Supplement: Data_Sheet_3.xlsx [file Data_Sheet_3.xlsx]

## Sheet: Supplementary Information 1
group	sequence	otu_id	indval	p value	frequency	kingdom	phylum	class	order	family	genus	species	taxon	funguild confidence_ranking	trophic mode	guild	growth_morphology	trait	notes	citation/source
OG	TTAAGTTCAGCGGGTATCCCTACCTGATCCGAGGTCAACCTGAAAAGATTGATTGGGGTCGCCGGCGGGCGCCGGCCGGGCCTACAGAGCGGGTGACGAAGCCCCATACGCTCGAGGACCGGACGCGGTGCCGCCGCTGCCTTTCGGGCCCGCCCCCCGGGAGCCGGGGGGCGAAGCCCAACACACAAGCCGTGCTTGAGGGCAGCAATGACGCTCGGACAGGCATGCCCCCCGGAATACCAGGGGGCGCAATGTGCGTT	OTU_428	0.803464	0.001	17	k__Fungi	p__Ascomycota	c__Eurotiomycetes	o__Eurotiales	f__Aspergillaceae	g__Penicillium	NA	Eurotiales	Possible	Saprotroph	Undefined Saprotroph	Microfungus	NULL	NULL	Sterkenburg E
OG	TTAAGTTCAGCGGGTATTCCTACCTGATCCGAGGTCAACCACAAAAAATTGGGGGTTTAGCGGCTGGGAGTTATAGCACCTAACAAAAGCGAGAAAAAAATTACTACGCTCAGAGGATACTACAAATCCGCCGTTGTATTTCAGGAACTACAACTCCTAAGAGAAGTAGATTCCCAACACTAAGCTAGGCTTAAGGGTTGAAATGACGCTCGAACAGGCATGCCCACTAGAATACTAATGGGCGCAATGTGCGTT	OTU_152	0.802503	0.001	13	k__Fungi	p__Ascomycota	c__Sordariomycetes	o__Xylariales	f__Sporocadaceae	g__Neopestalotiopsis	s__clavispora	-	-	-	-	-	-	Unassigned	-
OG	TTAAGTTCAGCGGGTAGTCCTACCTGATTCGAGGTCAACCACAAAAAGTAGGGGGTTTTACGGCGTGGCCGCGCTGCTCTCCAGTGCGAGGTGTGCTACTACGCATAGGAAGCTACAGCGTGACCGCCACTGCATTTGGGGGACGGCGTTCGGCGCGAAGCCGGGCTGCCGATCCCCAACACCAAGCCGGAGCTTGAGGGTTGAAATGACGCTCGAACAGGCATGCCCGCCAGAATACTGGCGGGCGCAATGTGCGTT	OTU_388	0.75	0.01	9	k__Fungi	p__Ascomycota	c__Sordariomycetes	o__Hypocreales	f__Nectriaceae	g__Mariannaea	s__samuelsii	Mariannaea	Probable	Saprotroph	Undefined Saprotroph	NULL	NULL	NULL	Tedersoo L
OG	TTAAGTTCAGCGGGTATTCCTACCTGATCCGAGGTCAACCTTGAAAAAGTTGGGGGTTTTACGGCGAGGCCATACCACTATCCAAGCTGCGAGGTATCACTACTACACAGAGGAGTTCGCGGTAGAGCCGCCACTGCATTTCGGGGCCGGCCGCCGCGAGGGACGGCCGATCCCCAACACCAGATCCCGCGAACGGGTTCTGAGGGTTGAAATGACGCTCGGACAGGCATGCCCGCCAGAATACTGGCGGGCGCAATGTGCGTT	OTU_477	0.587316	0.044	13	k__Fungi	p__Ascomycota	c__Sordariomycetes	o__Hypocreales	f__Cordycipitaceae	g__Beauveria	NA	Beauveria	Probable	Pathotroph	Animal Pathogen	NULL	NULL	NULL	Tedersoo L
OG	TTAAGTTCAGCGGGTATTCCTACCTGATCCGAGGTCAACTTTCAGAAGTCGGGGGTTTTCCGGCGTGGCCGCCGCCGCTCCCAGCTGCGAGGTTGTGCTACTACGCAGAGGTACACGGGCGGGGCCGCCACTGTATTTCGGGGCCGGCCGGTGAAGGCCGATCCCCAACGCCAGGCGCGGGAGCCTGAGGGTTGAAATGACGCTCGGACAGGCATGCCCGCCAGAATGCTGGCGGGCGCAATGTGCGTT	OTU_572	0.583333	0.019	7	k__Fungi	p__Ascomycota	c__Sordariomycetes	o__Hypocreales	f__Stachybotryaceae	NA	NA	Hypocreales	Possible	Saprotroph	Undefined Saprotroph	Microfungus	NULL	NULL	Sterkenburg E
OG	TTAAGTTCAGCGGGTATCCCTACCTGATTCGAGGTCAAACAAATAAAAGGTTCGCTTCTGGGGGGAGGCACGCGGGCGAGGAGCGCAATTCTGCTGCACTCCGGGCTACGGTGCCGGCCGCCAATCGCTTTGGGGCGAGTCCTCGCGGGAAGCGGGACAGACGCCCATCACCAAGCAGAGCTTGAGGGTGTAAATGACGCTCGAACAGGCATGCCCCGAGGAATACCTCGGGGCGCAATGTGCGTT	OTU_822	0.5	0.046	6	k__Fungi	p__Ascomycota	c__Dothideomycetes	o__Pleosporales	f__Teichosporaceae	g__Teichospora	s__austroafricana	Teichospora	Probable	Saprotroph	Undefined Saprotroph	NULL	NULL	NULL	Tedersoo L
OG	TTAAGTTCAGCGGGTATTCCTACCTGATCCGAGGTCAACCTTCAGAAGTGGGGGGTTTAACGGCGTGGCCGCGCTGCGTTCCCGTTGCGAGGTGTTAGCTACTACGCAGAGGAGGCTACAGCGAGACCGCCACTAGATTTCGGAGACGGCGCGCCGCGAGGGACGGGCCGAGCCCCAACACCAAGCCCGGGGGCTTGAGGGTTGAAATGACGCTCGAACAGGCATGCCCGCCAGAATACTGGCGGGCGCAATGTGCGTT	OTU_923	0.5	0.04	6	k__Fungi	p__Ascomycota	c__Sordariomycetes	o__Hypocreales	f__Nectriaceae	g__Fusicolla	NA	Hypocreales	Possible	Saprotroph	Undefined Saprotroph	Microfungus	NULL	NULL	Sterkenburg E
SL	TTAAGTTCAGCGGGTATTCCTACCTGATCCGAGGTCAACTCTTGAAAGTTGGGCGTTTTACGGCGTGACCGTCTCCGCGCTCCGGTGCGAGGTTGTGCTACTACGCAGGGGAGGCTGCGGCGAGGTCGCCACTGCATTTCGGGGGCGGCGCGCGCAGGGCGGCCGGCCCCCAACACCAGGTCCCCCCCGCGAAGGGGGGCCCTGAGGGTTGAAATGACGCTCGGACAGGCATGCCCGCCAGAATGCTGGCGGGCGCAATGTGCGTT	OTU_159	0.5	0.039	6	k__Fungi	p__Ascomycota	c__Sordariomycetes	o__Hypocreales	f__Ophiocordycipitaceae	g__Tolypocladium	s__album	Tolypocladium	Possible	Pathotroph-Symbiotroph	Animal Pathogen-Clavicipitaceous Endophyte-Fungal Parasite	NULL	NULL	Endophyte detection method-culture (Gazis et al. 2014)	Gazis R
OP	TTAAGTTCAGCGGGTATTCCTACCTGATCCGAGGTCAACATTCAGAAGTTGGGGTTTAACGGCGTGGCCGCGACGATTACCAGTAACGAGGGTTTTACTACTACGCTATGGAAGCTCGACGTGACCGCCAATCAATTTGAGGAACGCGAATTAACGCGAGTCCCAACACCAAGCTGTGCTTGAGGGTTGAAATGACGCTCGAACAGGCATGCCCGCCAGAATACTGGCGGGCGCAATGTGCGTT	OTU_127	0.997763	0.002	4	k__Fungi	p__Ascomycota	c__Sordariomycetes	o__Hypocreales	f__Nectriaceae	g__Fusarium	s__oxysporum	Fusarium	Possible	Pathotroph-Saprotroph-Symbiotroph	Animal Pathogen-Endophyte-Lichen Parasite-Plant Pathogen-Soil Saprotroph-Wood Saprotroph	Microfungus	NULL	Likely opportunistic human pathogen (Irinyi et al. 2015)	Duncan CG
OP	TTAAGTTCAGCGGGTATCCCTACCTGATCCGAGGTCAACCTGGATAGATTGATGGGGGGTCGCCGGCGGGCGCCGGCCGGGCCTACAGAGCGGGTGACGAAGCCCCATACGCTCGAGGACCGGACGCGGTGCCGCCGCTGCCTTTCGGGTCCGCCCCCCGGGACCGGGGGGCGGGGCCCAACACACAAGCCGTGCTTGAGGGCAGCAATGACGCTCGGACAGGCATGCCCCCCGGAATACCAGGGGGCGCAATGTGCGTT	OTU_1932	0.990937	0.002	4	k__Fungi	p__Ascomycota	c__Eurotiomycetes	o__Eurotiales	f__Aspergillaceae	g__Penicillium	s__annulatum	Eurotiales	Possible	Saprotroph	Undefined Saprotroph	Microfungus	NULL	NULL	Sterkenburg E
OP	TTAAGTTCAGCGGGTATTCCTACCTGATCCGAGGTCAACTCTAAGAAAGTTGGGCGTTTTACGGCGTGACCGCCTCCGCGCTCCGGTGCGAGGTGTGTGCTACTACGCAGGGGAGGCTGCGGCGGGGTCGCCACTGCATTTCGGGGGCGGCTGGTGTGCCGTCCCCCAACACCGAGGCCCCCGGGGGGGCTCGAGGGTTGAAATGACGCTCGAACAGGCATGCCCGCCAGAATGCTGGCGGGCGCAATGTGCGTT	OTU_106	0.895972	0.002	21	k__Fungi	p__Ascomycota	c__Sordariomycetes	o__Hypocreales	f__Ophiocordycipitaceae	g__Purpureocillium	s__lilacinum	Purpureocillium	Probable	Pathotroph	Fungal Parasite	NULL	NULL	NULL	Tedersoo L
OP	TTAAGTTCAGCGGGTATTCCTACCTGATTCGAGGTCAACTCTGAAAAAAAGTTGGGGGTTTTACGGCAGTGGCCATTCGCCGGGCTCCTGTTGCGAGGTGTGTGCTACTACGCAGAGGAGGGCCGCGACGAGGCCGCCAATTCATTTAGGGGGCGGCGACAGGACGGTTGTCCGTCGCCGGTCCCCAACACCAAGTCCACAGCAGGGGCTTGAGGGTTGAAATGACGCTCGAACAGGCATGCCCGCCAGAATACTGGCGGGCGCAATGTGCGTT	OTU_445	0.86711	0.003	10	k__Fungi	p__Ascomycota	c__Sordariomycetes	o__Hypocreales	f__Clavicipitaceae	g__Metarhizium	s__carneum	Metarhizium	Probable	Pathotroph	Animal Pathogen	NULL	NULL	NULL	Tedersoo L
OP	TTAAGTTCAGCGGGTATTCCTACCTGATTCGAGGTCAACTCTGAAAAAAAGTTGGGGGTTTTACGGCAGTGGCCATTCGCCGGGCTCCTGTTGCGAGGTGTGTGCTACTACGCAGAGGAGGGCCGCGACGAGGCCGCCAATTCATTTAGGGGGCGGCGACAGGACGGTTGTCCATCGCCGGTCCCCAACACCAAGTCCACAGCAGGGGCTTGAGGGTTGAAATGACGCTCGAACAGGCATGCCCGCCAGAATACTGGCGGGCGCAATGTGCGTT	OTU_260	0.846154	0.002	11	k__Fungi	p__Ascomycota	c__Sordariomycetes	o__Hypocreales	f__Clavicipitaceae	g__Metarhizium	s__carneum	Metarhizium	Probable	Pathotroph	Animal Pathogen	NULL	NULL	NULL	Tedersoo L
OP	TTAAGTTCAGCGGGTAGTCCTACCTGATTTGAGGTCAGAGGTCATAAGGTTGTCTCTATAACGAGACGGTTAGAAGCTCGCCCAAACGCTTCACGGTCGCGGCGTAGACATTATCACACCGACAAGCCGATCCGCAAGGAACCAAGCTAATGCGTTTAAGAGGAGCCGACCTATTAAAGACCGACAAGCCTCCAAGTCCAAGCCTACAAACCCATTACAAGGCTTGTAAGTTGAAGATTTCATGACACTCAAACAGGCATGCTCCTCGGAATACCAAGGAGCGCAAGGTGCGTT	OTU_115	0.740299	0.011	12	k__Fungi	p__Basidiomycota	c__Agaricomycetes	o__Polyporales	f__Ganodermataceae	g__Ganoderma	NA	Ganodermataceae	Probable	Pathotroph-Saprotroph	Plant Pathogen-Wood Saprotroph	Polyporoid	White Rot	Lignicolous	causing sometimes agressive white rots of timber (Cannon & Kirk 2007)
OP	TTAAGTTCAGCGGGTATTCCTACCTGATTCGAGGTCAACCTGAAAAAAATGGGGGGTCAGGCCGGCCCGGAGGGTCCTTTCAACTCGACGCGTGCTTCGAAAAGCTCGTTGCACCGAGGGTCCCACGGACGCCGTCATTGTCTTTGAGACCCGTTGCACCCCCGGAGGAGCCAACGCGGTCCAACACCAAACGCGAGGTTTGAGGGAGGATAATGACGCTCGAACAGGCATGCCCATCGGAATGCCAATGGGCGCAATGTGCGTT	OTU_404	0.666667	0.006	2	k__Fungi	p__Ascomycota	c__Eurotiomycetes	o__Chaetothyriales	f__Trichomeriaceae	g__Arthrocladium	NA	Arthrocladium	Probable	Pathotroph-Saprotroph	Animal Pathogen-Undefined Saprotroph	Microfungus	NULL	From leaf litter	rotten material
OP	TTAAGTTCAGCGGGTATCCCTACCTGATCCGAGGTCAAACGTTGAAAAAAGGCTTCATGGACGCCGACGCAGAGGGGAGAGACGCAAATTGTGCTGCGCTCTACCACCAGTACGTTGGCCGCCAATCGCTTTCAGGCGAGTCCTTTGCAGGACAAACGCCCAACACCAAGCAGTGCTTGAGGGTACAAAATGACGCTCGAACAGGCATGCCCCATGGAATACCAAGGGGCGCAATGTGCGTT	OTU_458	0.666667	0.01	2	k__Fungi	p__Ascomycota	c__Dothideomycetes	o__Pleosporales	f__Cucurbitariaceae	g__Pyrenochaetopsis	s__leptospora	Pyrenochaetopsis	Possible	Pathotroph-Saprotroph-Symbiotroph	Endophyte-Lichen Parasite-Undefined Saprotroph	Microfungus	NULL	NULL	Tedersoo L
OP	TTAAGTTCAGCGGGTCTTCCTACCTGATCCGAGGTCAACCTTGGGTAAAAAAGGCTTTTAACGGCCGGAACCCGCAGCACGCCCTAAGCGAGATGTATGTTACTACGCTCGGTGTGACTTGCGAGCCCGCCACTGGTTTTCAGGGCCTGCGGCAGCCGCAGGTCCCCAACACAAGCCTGGGGCTTGATGGTTGAAATGACGCTCGAACAGGCATGCCCGCCAGAATACTGGCGGGCGCAATGTGCGTT	OTU_566	0.666667	0.006	2	k__Fungi	p__Ascomycota	c__Sordariomycetes	o__Sordariales	f__Chaetomiaceae	g__Chaetomium	s__globosum	Chaetomium	Possible	Pathotroph-Saprotroph-Symbiotroph	Animal Pathogen-Dung Saprotroph-Endophyte-Epiphyte-Plant Saprotroph-Wood Saprotroph	Microfungus	Soft Rot	Saprobic	acting as key decay organisms of plant materials and plant-derived commodities (Cannon & Kirk 2007); Epiphyte detection method-culture (Massimo et al. 2015); Endophyte detection method-culture (Busby et al. 2016
OP	TTAAGTTCAGCGGGTATTCCTACCTGATTCGAGGTCAACCTGAAAAAAATGGGGGGTCAAGCCGGCCCGGAGGGTCCTTTCAACTCGACGCGTGCTTCGAAAAGCTCGTTGCACCGAGGGTCCCACGGACGCCGTCATTGTCTTTGAGACCCGTTGCACCCCCGGAGGAGCCAACGCGGTCCAACACCAAACGCGAGGTTTGAGGGAGGATAATGACGCTCGAACAGGCATGCCCATCGGAATGCCAATGGGCGCAATGTGCGTT	OTU_784	0.666667	0.013	2	k__Fungi	p__Ascomycota	c__Eurotiomycetes	o__Chaetothyriales	f__Trichomeriaceae	NA	NA	Trichomeriaceae	Probable	Symbiotroph	Epiphyte	Microfungus	NULL	Foliar epiphytes with the appearance of sooty moulds	mostly occurring on the surface of living leaves and apparently gaining their nutrients from insect exudates (Chomnunti et al. 2012)
OP	TTAAGTTCAGCGGGTAACTCCTACCTGATCCGAGGTCAACCGTGGTAAAACATGGTGGTGACCAACCCCCGCAGGTCCTTCCCGAGCGAGTGACAGAGCCCCATACGCTCGAGGACCAGACGGACGTCGCCGCTGCCTTTCGGGCAGGTCCCCGGGGGGACCACACCCAACACACAAGCCGTGCTTGAGGGCAGAAATGACGCTCGGACAGGCATGCCCCCCGGAATGCCAGGGGGCGCAATGTGCGTT	OTU_793	0.666667	0.007	2	k__Fungi	p__Ascomycota	c__Eurotiomycetes	o__Eurotiales	f__Trichocomaceae	g__Talaromyces	s__sayulitensis	Talaromyces	Probable	Saprotroph	Undefined Saprotroph	NULL	NULL	NULL	Tedersoo L
OP	TTAAGTTCAGCGCGTATTCCTACCTGATCCGAGGTCAACCTTGAGAAGTTTCCTAGTGAAAGGAGAGGACCGGGTCCCGGGTGCCCTGGTCCGGTACGTGCTCGGTGAAAAGCTCAGTGTACCGGGGGAACCACAGGCCGCCGTCATTGTCTTTCGGAGGGGTCGATCGCTCGACCGGCCGTCCAACACCAAGCACGAGGCCTGAGGGGTGATAATGACGCTCGAACAGGCATGCCCTTCGGAATACCAAAGGGCGCAATGTGCGTT	OTU_1472	0.666667	0.011	2	k__Fungi	p__Ascomycota	c__Eurotiomycetes	o__Chaetothyriales	f__Herpotrichiellaceae	g__Cladophialophora	s__chaetospira	Cladophialophora	Probable	Saprotroph	Undefined Saprotroph	Facultative Yeast	NULL	NULL	James TY
OP	TTAAGTTCAGCGGGTATTCCTACCTGATCCGAGGTCAACTTTCAGAAGTGGGGTGTTTAACGGCATGGCCACCGCCGCGTTCCAACTGCGAGGTTGTGCTACTACGCAGAGGAGGACTACAGCGAGACCGCCACTAGATTTCGGGGCCGGCGGCCTTACAGGAAGGCTGGGCCGATCCCCAACACCAGGCACTGGGGGCCTGAGGGTTGAAATGACGCTCGAACAGGCATGCCCGCCAGAATACTGGCGGGCGCAATGTGCGTT	OTU_1500	0.666667	0.013	2	k__Fungi	p__Ascomycota	c__Sordariomycetes	o__Hypocreales	f__Stachybotryaceae	g__Myrothecium	s__verrucaria	Myrothecium	Probable	Saprotroph	Undefined Saprotroph	NULL	NULL	NULL	Tedersoo L
OP	TTAAGTTCAGCGGGTAACTCCTACCTGATCCGAGGTCAACCGTGGTAAAATGTGGTGGTGACCAACCCCCGCAGGTCCTTCCCGAGCGAGTGACAAAGCCCCATACGCTCGAGGACCAGACGGACGTCGCCGCTGCCTTTCGGGCAGGTCCCCGGGGGGACCGCACCCAACACACAAGCCGTGCTTGAGGGCAGAAATGACGCTCGGACAGGCATGCCCCCCGGAATGCCAGGGGGCGCAATGTGCGTT	OTU_1645	0.666667	0.006	2	k__Fungi	p__Ascomycota	c__Eurotiomycetes	o__Eurotiales	f__Trichocomaceae	g__Talaromyces	NA	Talaromyces	Probable	Saprotroph	Undefined Saprotroph	NULL	NULL	NULL	Tedersoo L
OP	TTAAGTTCAGCGGGTATTCCTACCTGATCCGAGGTCAACCTTGGTGCCGCCTGAGCGGACTTGATGGGGGTTTAGAGGCTGGAAGCCCGCCGGCTCCCGATGCGAGGCAAATGTTACTACGCAAGGGAAGGGCCTGTAACGGGTCCGCCACTGGTTTTCGGGGACTGCCTGGGCAGATCCCCAACGCCGGGCCACGGGGGCTCGAGGGTTGAAACGACGCTCGGACAGGCATGCCTCCCAGGATACTGGAAGGCGCCATGTGCGTT	OTU_1952	0.666667	0.016	2	k__Fungi	p__Ascomycota	c__Sordariomycetes	o__Hypocreales	f__Hypocreales_fam_Incertae_sedis	g__Acremonium	s__furcatum	Acremonium	Possible	Pathogen-Saprotroph-Symbiotroph	Animal Pathogen-Endophyte-Fungal Parasite-Plant Pathogen-Wood Saprotroph	Microfungus	Soft Rot	Endophyte detection method-culture (Hanada et al. 2010	Del Olmo-Ruiz & Arnold 2014); Likely opportunistic human pathogen (Irinyi et al. 2015)
OP	TTAAGTTCAGCGGGTATTCCTACCTGATTCGAGGTCAACTTTAAAAAGATTTGGGCTTTTTACGGCAGTGGCCGCGTCGCGCTCCTGTTGCGAGATTTGTGCTTATACTACGCAGAGGAGGCCGCAACGAGACCGCCAATTCATTTCGGGGGCGGCGCAGCTTATTTCGCTATGCCGGTCCCCAACACCAAGCTAGGCTTGAGGGTTGAAATGACGCTCGAACAGGCATGCCCGCCAGAATACTGGCGGGCGCAATGTGCGTT	OTU_2033	0.666667	0.006	2	k__Fungi	p__Ascomycota	c__Sordariomycetes	o__Hypocreales	f__Clavicipitaceae	NA	NA	Hypocreales	Possible	Saprotroph	Undefined Saprotroph	Microfungus	NULL	NULL	Sterkenburg E
OP	TTAAGTTCAGTGGGTATTCCTACCTGATCCGAGGTCAACTCTAAGAAAGTTGGGCGTTTTACGGCGTGACCGCCTCCGCGCTCCGGTGCGAGGTGTGTGCTACTACGCAGGGGAGGCTGCGGCGGGGTCGCCACTGCATTTCGGGGGCGGCTGGTGTGCCGTCCCCCAACACCGAGGCCCCCGGGGGGGCTCGAGGGTTGAAATGACGCTCGAACAGGCATGCCCGCCAGAATGCTGGCGGGCGCAATGTGCGTT	OTU_2069	0.666667	0.007	2	k__Fungi	p__Ascomycota	c__Sordariomycetes	o__Hypocreales	f__Ophiocordycipitaceae	g__Purpureocillium	s__lilacinum	Purpureocillium	Probable	Pathotroph	Fungal Parasite	NULL	NULL	NULL	Tedersoo L
OP	TTAAGTTCAGCGGGTATTCCTACCTGATCCGAGGTCAACCTTAGTAAAATTGGGGGTTTTACGGCTAGAGTCCCTCCGAATCCCAATGCGAGACGAAATGTTACTACGCAAAGGAGGCTCCGAGAGGGTCCGCCACTACCTTTAAGGGCCTACGTCAACCGTAGAGCCCCAACACCAAGCAGAGCTTGAGGGTTGAAATGACGCTCGAACAGGCATGCCCGCCAGAATGCTGGCGGGCGCAATGTGCGTT	OTU_2248	0.666667	0.01	2	k__Fungi	p__Ascomycota	c__Sordariomycetes	o__Glomerellales	f__Glomerellaceae	g__Colletotrichum	NA	Colletotrichum	Probable	Pathotroph-Symbiotroph	Endophyte-Plant Pathogen	Microfungus	NULL	NULL	Costa IPMW
OP	TTAAGTTCAGCGGGTATTCCTACCTGATCTGAGGTCAACCTTAGAAATTGGGTGTTTTACGGCGTGGGCCGACTGCTATCCAGCTGCGAGGTATTACTACTGCACAGAGGAGATCACAGAAGGACCGCCACTAGGTTTAAGGGCCGGCCGCCGTAAGGCTGGTCGATCCCCAACAGCAGGTCCCGCGAACGGGTCCTGAGGGTTGAAATGACGCTCAGACAGGCATGCCCGCCAGAATACTGGCGGGCGCAATGTGCGTT	OTU_2595	0.666667	0.007	2	k__Fungi	p__Ascomycota	c__Sordariomycetes	o__Hypocreales	f__Hypocreales_fam_Incertae_sedis	g__Acremonium	s__alternatum	Acremonium	Possible	Pathogen-Saprotroph-Symbiotroph	Animal Pathogen-Endophyte-Fungal Parasite-Plant Pathogen-Wood Saprotroph	Microfungus	Soft Rot	Endophyte detection method-culture (Hanada et al. 2010	Del Olmo-Ruiz & Arnold 2014); Likely opportunistic human pathogen (Irinyi et al. 2015)
OP	TTAAGTTCAGCGGGTATTCCTACCTGATTCGAGGTCAACCTGACAAAAAGAAAGGTCAGACCGGCCCGGAAGGTCCTTTCGACTCGACGCGTGCTTCGGAAAGCTCGTTGCACCGAGGGTCCCACGGACGCCGTCATTGTCTTTGAGACCCGTTGGTCCCGGAGGAGCCAACGTGGTCCAACACCAAACACGAGGTTTGAGGGAGGATAATGACGCTCGAACAGGCATGCCCATCGGAATACCAATGGGCGCAATGTGCGTT	OTU_2656	0.666667	0.006	2	k__Fungi	p__Ascomycota	c__Eurotiomycetes	o__Chaetothyriales	NA	NA	NA	-	-	-	-	-	-	Unassigned	-
OP	TTAAGTTCAGCGGGTATTCCTACCTGATCCGAGGTCAACATTCAGAAGTTGGGGTTTTACGGCGTGGCCGCGACGATTACCAGTAACGAGGTGTATGATTACTACGCTATGGAAGCTCGACGTGACCGCCAATCGATTTGGGGAACGCGGGTTACCGCGAGTCCCAACACCAAGCTGAGCTTGAGGGTTGAAATGACGCTCGAACAGGCATGCCCGCCAGAATACTGGCGGGCGCAATGTGCGTT	OTU_3357	0.666667	0.016	2	k__Fungi	p__Ascomycota	c__Sordariomycetes	o__Glomerellales	f__Plectosphaerellaceae	g__Plectosphaerella	NA	Plectosphaerella	Possible	Pathotroph	Plant Pathogen	Microfungus	NULL	NULL	Sterkenburg E
OP	TTAAGTTCAGCGGGTAGTCCTACTTGATTTGAGGTCAGATGTTCAGATAGTGTCCCGAAGGACGATTAGAAGCTAGAATATTAAATTCACCGAGAGGAAGCAACGTAGACAATTATCACGTTGAATCCTGCTTGGTTCTATTCAAGCTAATGCATTTCAGAGGAGCTGACGTCTGAATAAAAAAATATCCAGCTGCCTGCAAAGCCTCCACATCCAAGCCCAACTGCATTTAATAAAAAATACAGGAGGGTTGAGAATACCATGACACTCAAACAAGCATGCTCCTCGGAATACCAAGGAGCGCAAGGTGCGTT	OTU_4875	0.666667	0.009	2	k__Fungi	p__Basidiomycota	c__Agaricomycetes	o__Polyporales	f__Polyporales_fam_Incertae_sedis	g__Junghuhnia	NA	Junghuhnia	Highly Probable	Saprotroph	Wood Saprotroph	Corticioid	White Rot	NULL	Gilbertson RL
OP	TTAAGTTCAGCGGGTATTCCTACCTGATCCGAGGTCAACCTTGAGAAGTTCTTCAGCAAAGAAGAGGTTTTACGGCCGGTAATCCCCCCACGGGCCTCCATAGCGAGATATTTTACTACTACGCTCGGAGCCGCGGCGGGTCCGCCACTGATTCTAGGGGATCTTTAAGAAGCCCCGACGCCAGGCACCAGGGCCTGAGTGGTTGAAATGACGCTCGAACAGGCATGCCCGCCAGAATACTGGCGGGCGCAATGTGCGTT	OTU_5775	0.666667	0.009	2	k__Fungi	p__Ascomycota	c__Sordariomycetes	o__Microascales	f__Halosphaeriaceae	NA	NA	Halosphaeriaceae	Probable	Saprotroph	Undefined Saprotroph-Wood Saprotroph	Microfungus	NULL	Found in aquatic habitats	mostly in marine environments; saprobic on submerged or intertidal wood
OP	TTAAGTTCAGCGGGTAGTCCTACCTGATTTGAGGTCAGATGTCAATGAAGTTGTCTCTAATGAGACAGTTAGAAGCCCGCCAAACGCTTCACGGTCACGGCGTAGACAATTATCACACCGAGAGCCGATCCGCAAGGAATCAAGCTAATGCATTTAAGAGGAGCCGACGGTTTAGAGCCAGCAAGCCTCCAAGTCCAAGTCTATAAACCCGCAAAGGCTTATAGATTGAGAATTTCACGACACTCAAACAGGCATGCTCCTCGGAATACCAAGGAGCGCAAGGTGCGTT	OTU_7244	0.666667	0.006	2	k__Fungi	p__Basidiomycota	c__Agaricomycetes	o__Polyporales	f__Polyporaceae	g__Grammothele	s__fuligo	Polyporaceae	Probable	Saprotroph	Wood Saprotroph	Polyporoid	Brown Rot-White Rot	Lignicolous	causing brown or white rot
OP	TTAAGTTCAGCGGGTATTCCTACCTGATCCGAGGTCAACCTTGAGAAGTATTTCCCGTGAGGGAAAAAGTTTTTACGGCCGGTAAGCCCCCCCGCGGACCTCCTAAGCGAGATATTTTACTACTGCGCTCGGAGCCGCGGCGGGTCCGCCACTGTCTCTAGGGGCTTCTGCTGTTACACAGAACACCCCGACGCCAGGCACCAGGGCCTGAGTGGTTGAAATGACGCTCGAACAGGCATGCCCGCCAGAATACTGGCGGGCGCAATGTGCGTT	OTU_11610	0.666667	0.012	2	k__Fungi	p__Ascomycota	c__Dothideomycetes	o__Dothideomycetes_ord_Incertae_sedis	f__Dothideomycetes_fam_Incertae_sedis	g__Paramicrothyrium	NA	Paramicrothyrium	Probable	Saprotroph	Undefined Saprotroph	NULL	NULL	NULL	Tedersoo L
OP	TTAAGTTCAGCGGGTATCCCTACCTGATCCGAGGTCAAACGTTGAAAAAAGGCTTCATGGACGCCAACGTAGAAGGGAGAGACGCAAATTGTGCTGCGCTCTACCACCAGTACGTTGGCCGCCAATCGCTTTCAGGCGAGTCCTTTGCAGGACAAACGCCCAACACCAAGCAGTGCTTGAGGGTACAAAATGACGCTCGAACAGGCATGCCCCATGGAATACCAAGGGGCGCAATGTGCGTT	OTU_681	0.62906	0.01	3	k__Fungi	p__Ascomycota	c__Dothideomycetes	o__Pleosporales	f__Cucurbitariaceae	g__Pyrenochaetopsis	s__leptospora	Pyrenochaetopsis	Possible	Pathotroph-Saprotroph-Symbiotroph	Endophyte-Lichen Parasite-Undefined Saprotroph	Microfungus	NULL	NULL	Tedersoo L
OP	TTAAGTTCAGCGGGTATTCCTACCTGATCCGAGGTCAACCTTGAGAATATGGGGTTTAACGGCTAGGTCCCTCCAGCTCTCCAAAGCGGTAATAATTACTACGCTCGGGATCACAAAAGGTCCGCCACTAGTCTTAAGGGCCTACGCGCGAGGCGTAGGACCCCAACACCAAGCAAAGCTTGAGGGTTGAAATGACGCTCGAACAGGCATACCTACCAGAATACTGGTAGGTGCAATGTGCGTT	OTU_3596	0.583333	0.02	3	k__Fungi	p__Ascomycota	c__Sordariomycetes	NA	NA	NA	NA	-	-	-	-	-	-	Unassigned	-
OP	TTAAGTTCAGCGGGTATTCCTACCTGATTCGAGGTCAACATTCAGAAGTTGGGGGTTTTACGGCTTGGCCGCGCCGCTCTCCAGTTGCGAGGTGTTAGCTACTACGCAATGGAAGCTGCGGCGGGACCGCCACTGTATTTAGGGGACGGCGTATGCCCACAGGGGGCTTTCCGCCGATCCCCAACGCCAGGCCCGGGGGCCTGAGGGTTGTAATGACGCTCGAACAGGCATGCCCGCCAGAATACTGGCGGGCGCAATGTGCGTT	OTU_234	0.52459	0.033	4	k__Fungi	p__Ascomycota	c__Sordariomycetes	o__Hypocreales	f__Nectriaceae	g__Fusarium	NA	Fusarium	Possible	Pathotroph-Saprotroph-Symbiotroph	Animal Pathogen-Endophyte-Lichen Parasite-Plant Pathogen-Soil Saprotroph-Wood Saprotroph	Microfungus	NULL	Likely opportunistic human pathogen (Irinyi et al. 2015)	Duncan CG
OP	TTAAGTTCAGCGGGTATTCCTACCTGATCCGAGGTCAACCACAAAAAATTGGGGGTTTAGCGGCTGGGAGCTGCAGCACCTAACAAAAGCGAGAAATAATTTACTACGCTCAGAGGATACCACAGATCCGCCGTTGTATTTCAGGAATTACACAACTGTAAATTCCCAACACTAAGCTAGGCTTAAGGGTTGAAATGACGCTCGAACAGGCATGCCCACTAGAATACTAATGGGCGCAATGTGCGTT	OTU_1328	0.505051	0.042	4	k__Fungi	p__Ascomycota	c__Sordariomycetes	o__Xylariales	f__Sporocadaceae	g__Pseudopestalotiopsis	s__theae	-	-	-	-	-	-	Unassigned	-
OP	TTAAGTTCAGCGGGTATCCCTACCTGATCCGAGGTCAACCTGAGATAATTAAAGGTTGGGGGTCGGCTGGCGCCGGCCGGGCCTACTAGAGCGGGTGACGAAGCCCCATACGCTCGAGGACCGGACGCGGTGCCGCCGCTGCCTTTCGGGCCCGTCCCCCCGGCGGGGGGGACGGGGCCCAACACACAAGCCGGGCTTGAGGGCAGCAATGACGCTCGGACAGGCATGCCCTCCGGAATACCAGAGGGCGCAATGTGCGTT	OTU_8413	0.493827	0.02	3	k__Fungi	p__Ascomycota	c__Eurotiomycetes	o__Eurotiales	f__Aspergillaceae	g__Penicillium	s__citrinum	Eurotiales	Possible	Saprotroph	Undefined Saprotroph	Microfungus	NULL	NULL	Sterkenburg E
OP	TTAAGTTCAGCGGGTAATCCTACCTGATTTGAGGTCAGATTGTCAAATATTGTCTGTGAAGACGATTAGAAGCAAAGCTCTATTCATGCTGCCTCACAATAGCGTAGATAATTATCACACTAGAGATTAGCGGCAAAAGCACTGCTAATGCATTTAAGGATAGCCGACTTGTGAAAGCCCGCAAATCCCAAGATCCAAGCTATACATGTTATAAAAACTTGTATAGTTGAGAATTTAATGACACTCAAACAGGCATGCTCCTCGGAATACCAAGGAGCGCAAGGTGCGTT	OTU_256	0.475015	0.046	5	k__Fungi	p__Basidiomycota	c__Agaricomycetes	o__Agaricales	f__Entolomataceae	g__Clitopilus	NA	Clitopilus	Probable	Saprotroph	Undefined Saprotroph	Agaricoid	NULL	NULL	Tedersoo L
